# Supplementary material for: iValiD-TB: a fully characterized Mycobacterium tuberculosis dataset for antimicrobial resistance bioinformatics workflow validations
Source: Frontiers journal article supplement (doi:10.3389/ftubr.2024.1441923), 2024-09-13
Supplement: Table_1.XLSX [file Table_1.XLSX]

## Sheet: Sup. Table 1
		Sample Name	Lineage	Notable Feature(s)	WGS Antimicrobial Resistance-associated Gene/Loci Mutations and Amino Acid Substitutions	Phenotypic DST Resistance	Final AR Categorization
IDR1900048058-01-01		iValiD_TB_S1	L3	INH resistance	INH (katG Ser315Thr)	MGIT (INH 0.1)	Monoresistant
IDR2000206430-01-02		iValiD_TB_S2	L2	Multidrug resistance; atypical embB gene resistance mutation	RIF, INH, ETH, KAN, EMB, SM (rpoB Ser450Leu, katG Ser315Thr, eis G-10A, ethA Tyr140STOP, embB Tyr319Cys)	MGIT (RIF 1.0; INH 0.1, 0.4; EMB 5.0; SM 1.0) AP (RIF 1.0; INH 0.2, 1.0; EMB 5.0; SM 2.0; ETH 5.0); (AMI 2.0, 4.0 susceptible)*	MDR
IDR1900063330-01-01		iValiD_TB_S3	L4	gyrB gene resistance mutation	FLQ (gyrB Asp461Asn)	AP (OFL 1.0, 2.0; LVX 1.0; MOX: 0.5)	Monoresistant
IDR1700051763-01-03		iValiD_TB_S4	L4	rpoB gene resistance mutation outside of RRDR	RIF (rpoB Ile491Phe)	MGIT (RIF 1.0 susceptible)*	Monoresistant*
IDR1800016246-01-02		iValiD_TB_S5	L1	Multidrug resistance	RIF, INH, PZA, EMB, SM (rpoB Ser450Leu, katG Ser315Thr, embB Met306Ile, pncA Thr76Pro, rpsL Lys43Arg)	MGIT (INH 0.1; 0.4; RIF 1.0; PZA 100); (EMB 5.0 susceptible)* AP (INH 0.2, 1.0; RIF 1.0; EMB 5.0, SM 2.0)	MDR
IDR1600037096-01-01		iValiD_TB_S6	L4	Silent RRDR mutation & silent resistance SNP	INH, ETH (mabA Leu203Leu)	MGIT (INH 0.1); (INH 0.4 susceptible) AP (INH 0.2; ETH 5.0); (INH 1.0 susceptible)	MDR
IDR1700051920-01-01		iValiD_TB_S7	L5	M. africanum	None	MGIT (SIRE-P susceptible)	Pan-susceptible
IDR1700047580-01-02		iValiD_TB_S8	L6	M. africanum	None	MGIT (SIRE-P susceptible)	Pan-susceptible
IDR1800053034-01-01		iValiD_TB_S9	L4	FLQ monoresistance	FLQ (gyrA Ala90Val)	MGIT (OFL 2.0)	Monoresistant
IDR1900029234-01-01		iValiD_TB_S10	L2	Multidrug resistance, low-level rifampin resistance & pncA gene deletion	RIF, INH, SM, PZA, KAN/AMI (rpoB Leu430Pro, katG Ser315Thr, rrs A513C, pncA 63% gene deletion, rrs A1400G)	MGIT (INH 0.1, 0.4; SM 1.0, PZA 100); (RIF 1.0 susceptible)* AP (INH 0.2, 1.0; SM 2.0; KAN 5.0; AMI 2.0, 4.0)	MDR
IDR1600008969-01-02		iValiD_TB_S11	L4	Pan-susceptible	None	MGIT (SIRE-P susceptible)	Pan-susceptible
IDR2000170071-01-01		iValiD_TB_S12	L9	M. africanum, rare lineage	None	MGIT (SIRE-P susceptible)	Pan-susceptible
IDR1600055553-01-01		iValiD_TB_S13	L2	Multidrug resistance, atypical embB gene resistance mutation	RIF, INH, PZA, EMB, SM, KAN/AMI, ETH (rpoB Ser531Leu, katG Ser315Thr, inhA C-15T, pncA Leu151Gln + 1nt insertion, embC-A C-12T + embB Tyr334His, rpsL Lys88Arg, rrs A1400G)	MGIT (PZA 100) AP (INH 0.2, 1.0; RIF 1.0; EMB 5.0; SM 2.0; ETH 5.0; KAN 5.0; AMI 2.0, 4.0)	MDR
IDR1800011961-01-01		iValiD_TB_S14	L4	Low-level rifampin monoresistance	RIF (rpoB Leu430Pro)	MGIT (RIF 1.0 susceptible)*	Monoresistant*
IDR1600000726-01-00		iValiD_TB_S15	L4	katG gene deletion	INH (katG 21 nt deletion)	MGIT (INH 0.1, 0.4) AP (INH 0.2, 1.0)	Monoresistant
IDR1800037165-01-01		iValiD_TB_S16	L2	Pan-susceptible	None	MGIT (SIRE-P susceptible)	Pan-susceptible
IDR1900031552-01-01		iValiD_TB_S17	L4	Multidrug resistance	RIF, INH, EMB, PZA, SM (rpoB Ser450Leu, katG Ser315Thr, embB Gln497Arg, pncA 1 nt deletion, gidB 1 nt deletion)	MGIT (INH 0.1; EMB 5.0; PZA 100; RIF 1.0)	MDR
IDR1800040465-01-01		iValiD_TB_S18	L1	Pan-susceptible	None	MGIT (SIRE-P susceptible)	Pan-susceptible
IDR1800015680-01-01		iValiD_TB_S19	L4	Silent RRDR mutation	None	MGIT (SIRE-P susceptible)	Pan-susceptible
IDR2000009439-01-01		iValiD_TB_S20	L4	Atypical katG mutation	INH (katG Trp191Gly)	AP (INH 0.2); (INH 1.0 susceptible)	Monoresistant
IDR1800012259-01-01		iValiD_TB_S21	L2	FLQ & INH resistance	FLQ, INH (gyrA Asp94Asn, katG Ser315Thr)	MGIT (INH 0.1, 0.4; OFL 2.0) AP (INH 0.2, 1.0; OFL 1.0, 2.0, 4.0)	MDR
IDR1800049308-01-01		iValiD_TB_S22	L3	L3 MDR; neutral pncA gene SNP	RIF, INH, EMB, ETH (rpoB Ser450Leu, katG Ser315Thr, embB Met306Val, ethA Trp289STOP) neutral pncA His137Gln	MGIT (INH 0.1; RIF 1.0; EMB 5.0); (PZA 100 susceptible)	MDR
IDR1700016346-01-01		iValiD_TB_S23	L3	L3 MDR; double embB mutations	RIF, INH, PZA, EMB, SM (rpoB Ser450Leu, katG Ser315Thr, pncA Asp12Ala, embB Met306Ile + Gly406Asp, Lys88Met)	MGIT (INH 0.1; RIF 1.0; PZA 100; EMB 5.0) AP: (INH 0.2, 1.0; EMB 5.0; RIF 1.0; SM 2.0)	MDR
IDR1500070900-01-00		iValiD_TB_S24	M. caprae	Pan-susceptible	None	MGIT (SIRE-P susceptible)	Pan-susceptible
IDR1900042879-01-01		iValiD_TB_S25	L4	Heterozygous atypical gyrA gene resistance mutation	FLQ (gyrA Gly88Cys)	MGIT (OFL 1.0) AP (LVX 1.0, 2.0, 4.0; MOX 0.5, 1.0, 2.0)	Monoresistant
IDR1900045557-01-01		iValiD_TB_S26	L4	Pre-XDR; pncA and ethA deletions	FLQ, INH, RIF, EMB, ETH, PZA, SM (gyrA Asp94Gly, rpoB His445Asp, embB Tyr319Cys, katG Ser315Thr, pncA full gene deletion, ethA 1 nt deletion, rrs A513C)	MGIT (PZA 100) AP (INH 0.2, 1.0; RIF 1.0; EMB 5.0; ETH 5.0; SM 2.0; OFL 1.0, 2.0, 4.0)	MDR (Pre-XDR)
IDR1600033693-01-01		iValiD_TB_S27	L1	Atypical inhA gene resistance mutation	INH, ETH, EMB, SM (inhA Val21Ala, embB Met306Val, gidB Pro75Ser)	MGIT (INH 0.1, 0.4; EMB 5.0; SM 1.0) AP (INH 0.2, 1.0; EMB 5.0; ETH 5.0)	MDR
IDR1600031214-01-01		iValiD_TB_S28	L1	Multidrug resistance, atypical embB gene resistance mutation	RIF, INH, PZA, EMB, FLQ, SM (rpoB Ser450Leu, katG Ser315Thr, pncA Gln10Pro, embB Gly294Ser, gyrA Ala90Val, rrs A513C)	MGIT (INH 0.1; RIF 1.0; EMB 5.0; PZA 100) AP (SM 4.0)	MDR
IDR1900023886-01-01		iValiD_TB_S29	L4	RIF monoresistance	RIF (rpoB His445Asp)	MGIT (RIF 1.0)	Monoresistant
IDR1900017540-01-01		iValiD_TB_S30	L4	Atypical katG gene resistance mutation	INH (katG Gly121Asp)	MGIT (INH 0.1, 0.4) AP (INH 0.2, 1.0)	Monoresistant
IDR1600034870-01-01		iValiD_TB_S31	L1	Pan-susceptible	None	MGIT (SIRE-P susceptible)	Pan-susceptible
IDR1800001491-01-01		iValiD_TB_S32	L4	Pan-susceptible	None	MGIT (SIRE-P susceptible)	Pan-susceptible
IDR1600049481-01-01		iValiD_TB_S33	L2	Atypical katG gene resistance mutation	INH (katG Trp300Arg)	MGIT (INH 0.1, 0.4)	Monoresistant
IDR1500072113-01-00		iValiD_TB_S34	M. bovis-BCG	M. bovis BCG (PZA monoresistance)	PZA (pncA His57Asp)	MGIT (PZA 100)	Monoresistant
IDR1700018665-01-01		iValiD_TB_S35	M. bovis	M. bovis with second-line drug resistance	PZA, SM, KAN/ AMI (pncA His57Asp, rpsL Lys43Arg, rrs A1400G)	MGIT (PZA 100) AP (SM 2.0; KAN 5.0; AMI 1.0, 2.0, 4.0)	MDR
IDR1800053037-01-01		iValiD_TB_S36	L2	katG promoter mutation	INH (furA-katG A-9C)	MGIT (INH 0.1)	Monoresistant
IDR1500053660		iValiD_TB_S37	L2	katG full gene deletion	INH (katG + katG promoter full gene deletion)	MGIT (INH 0.1, 0.4) AP (INH 0.2, 1.0)	Monoresistant
15-61133		iValiD_TB_S38	L4	Pan-susceptible	None	MGIT (SIRE-P susceptible)	Pan-susceptible
IDR1700051930-01-01		iValiD_TB_S39	L4	XDR	RIF, INH, INH, ETH, PZA, SM, KAN/AMI, FLQ (rpoB Ser531Leu, katG Ser315Thr, mabA Leu203Leu, pncA Lys96Thr, rpsL Lys88Arg, rrs A1400G, gyrA Ala90Val)	MGIT (RIF 1.0, INH 0.1, EMB 5.0, PZA 100) AP (INH 0.2, 1.0; EMB 5.0;SM 2.0; KAN 5.0; AMI 2.0, 4.0; ETH 5.0; OFL 1.0, 2.0)	XDR
IDR1800029641-01-01		iValiD_TB_S40	L4	H37Rv reference	None	None	Pan-susceptible
IDR2000220261-01-02		iValiD_TB_S41	L3	Pan-susceptible	None	MGIT (SIRE-P susceptible)	Pan-susceptible
IDR1700031843-01-01		iValiD_TB_S42	L3	Neutral RRDR	None	MGIT (SIRE-P susceptible)	Pan-susceptible
IDR1600027139-01-01		iValiD_TB_S43	L2	Multidrug resistance; W-strain	RIF, INH, PZA, EMB, SM, KAN/ AMI, ETH (rpoB His445Tyr, katG Ser315Thr, pncA Thr47Ala, embB Met306Val, rpsL Lys43Arg, rrs A1400G, ethA 1 nt deletion)	MGIT (INH 0.1, 0.4; RIF 1.0; EMB 5.0; SM 1.0; PZA 100) AP (INH 0.2, 1.0; RIF 1.0; EMB 5.0; ETH 5.0; KAN 5.0; AMI 2.0, 4.0)	MDR
IDR1800008840-01-01		iValiD_TB_S44	L1	INH monoresistance	INH/ETH (mabA-inhA C-15T)	MGIT (INH 0.1, 0.4) AP (INH 0.2; ETH 5.0); (KAN 5.0; AMI 2.0, 4.0 susceptible)	MDR
IDR1700037259-01-01		iValiD_TB_S45	L4	Multidrug resistance; rpoB gene resistance mutation outside RRDR	RIF, INH, EMB, SM (rpoB Val170Phe, katG Ser315Thr, embB Gly406Asp, gidB Arg166Trp)	MGIT (INH 0.1, 0.4; RIF 1.0; SM 2.0); (EMB 5.0, PZA 100 susceptible)* AP (INH 0.2, 1.0; RIF 1.0); (EMB 5.0 susceptible)*	MDR
IDR1700013349-01-01		iValiD_TB_S46	L4	Silent RRDR mutation; silent resistance mutation	INH (mabA Leu203Leu)	MGIT (INH 0.1) AP (INH 0.2; ETH 5.0)	Monoresistant
IDR1600001742-01-00		iValiD_TB_S47	L3	FLQ monoresistance	FLQ (gyrA heterozygous Asp94His, gyrB heterozygous Gly470Ser)	MGIT (OFL 2.0)	Monoresistant
IDR1700050893-01-01		iValiD_TB_S48	L2	katG promoter mutation	INH, SM (furA-katG promoter A-10C, rrs A513C)	MGIT (INH 0.1, 0.4) AP (INH 0.2)	Monoresistant
IDR1600044262-01-02		iValiD_TB_S49	L4	Multidrug resistance; multiple INH resistance mutations	RIF, INH, PZA, EMB, SM, FLQ, ETH (rpoB Asp435Tyr, katG Ser315Thr, inhA C-15T, pncA Val63Gly, embB Met306Val, rrs C516T), gyrA Ala90Val, ethA 1nt deletion)	MGIT (PZA 100) AP (INH 0.2, 1.0; RIF 1.0; EMB 5.0; SM 2.0; ETH 5.0; OFL 1.0, 2.0, 4.0)	MDR
IDR1900042441-01-02		iValiD_TB_S50	L3	katG gene start codon mutation	INH (katG 1Val1 GTG->GTA heterozygous)	MGIT (INH 0.1, 0.4) AP (INH 0.2, 1.0)	Monoresistant
		*Discrepant results between WGS results and Low-level resistance phenotypic results
		SIRE-P (Streptomycin/Isoniazid/Rifampin/Ethambutol/Pyrazinamide), AP (Agar Proportion), MGIT (Mycobacteria Growth Indicator Tube), Antimicrobial Concentrarion in ug/ml, MDR (Multidrug Resistance), XDR (Extensively Drug-Resistant)
		RIF- rifampin; INH-isoniazid; EMB- ethambutol; PZA- pyrazinamide; SM- streptomycin; ETH- ethionamide; FLQ- fluoroquinolone; KAN- kanamycin; AMI- Amikacin; LVX (levofloxacin), OFL (ofloxacin) and moxifloxacin (MOX) have been used as representative for the FLQ drug class
