# Supplementary material for: iValiD-TB: a fully characterized Mycobacterium tuberculosis dataset for antimicrobial resistance bioinformatics workflow validations
Source: Frontiers journal article supplement (doi:10.3389/ftubr.2024.1441923), 2024-09-13
Supplement: Table_2.XLSX [file Table_2.XLSX]

## Sheet: Screened Loci
Start	Stop	Strand	Locus Tag	Locus Name	Lnked Resistance
5240	7267	+	Rv0005	gyrB	Fluoroquinolones
7302	9818	+	Rv0006	gyrA	Fluoroquinolones
490783	491793	+	Rv0407	fgd1	Delamanid/Pretomanid
575348	576790	+	Rv0486	mshA	Ethionamid
759807	763325	+	Rv0667	rpoB	Rifampin
763370	767320	+	Rv0668	rpoC	Rifampin compensatory
775586	778480	-	Rv0676c	mmpL5	Clofazimine/Bedaquiline
778477	778905	-	Rv0677c	mmpS5	Clofazimine/Bedaquiline
778906	778989	-	intergenic rv0678-mmpS	rv0678-mmpS5 promoter region	Clofazimine/Bedaquiline
778990	779487	+	Rv0678	Rv0678	Clofazimine/Bedaquiline
781560	781934	+	Rv0682	rpsL	Streptomycin
800809	801462	+	Rv0701	rplC	Linezolid
1302931	1305501	+	Rv1173	fbiC	Delamanid/Pretomanid
1417348	1417657	-	intergenic Rv1268c-embR	Rv1268c-embR promoter region	Ethambutol
1461045	1461290	+	Rv1305	atpE	Bedaquiline
1471847	1473382	+	rrs	rrs	Streptomycin
1473658	1476795	+	rrl	rrl	Linezolid
1673300	1673439	+	intergenic Rv1482c-mabA	mabA-inhA promoter region	Isoniazid
1673440	1674183	+	Rv1483	mabA	Isoniazid/Ethionamid
1674184	1674201	+	intergenic mabA-inhA	mabA-inhA intergenic region	Isoniazid/Ethionamid
1674202	1675011	+	Rv1484	inhA	Isoniazid/Ethionamid
1917940	1918746	+	Rv1694	tlyA	Aminoglycosides
2101651	2103042	-	Rv1854c	ndh	Isoniazid
2103043	2103183	-	intergenic ndh	ndh promoter region	Isoniazid
2153889	2156111	-	Rv1908c	katG	Isoniazid
2156112	2156148	-	intergenic furA-katG	furA-katG promoter region	Isoniazid
2156149	2156592	-	Rv1909c	furA	Isoniazid
2288681	2289241	-	Rv2043C	pncA	Pyrazinamide
2289242	2289281	-	intergenic pncA	pncA promoter region	Pyrazinamide
2715333	2715469	-	intergenic	eis promoter region	Kanamycin/Amikacin
2726088	2726192	+	intergenic oxyR-ahpC	oxyR-ahpC promoter region	Isoniazid
2726193	2726780	+	Rv2428	ahpC	Isoniazid
2746135	2747598	-	Rv2447c	folC	Para-Aminosalisylic Acid
2859300	2860418	-	Rv2535c	pepQ	Clofazimine/Bedaquiline
2986839	2987615	+	Rv2671	ribD	Para-Aminosalisylic Acid
3073680	3074471	-	Rv2764c	thyA	Para-Aminosalisylic Acid
3074472	3074635	-	intergenic thyA-Rv2765	thyA-Rv2765 promoter region	Aminoglycosides
3336796	3337917	-	Rv2981c	ddlA	D-Cycloserine
3339118	3339762	+	Rv2983	fbiD	Delamanid/Pretomanid
3640543	3641538	+	Rv3261	fbiA	Delamanid/Pretomanid
3641535	3642881	+	Rv3262	fbiB	Delamanid/Pretomanid
3840194	3841420	-	Rv3423c	alr	D-Cycloserine
3877464	3878507	-	Rv3457c	rpoA	Rifampin compensatory
3986844	3987299	+	Rv3547	ddn	Delamanid/Pretomanid
4038158	4040704	-	Rv3596c	clpC1	Pyrazinamide
4043862	4044281	-	Rv3601c	panD	Pyrazinamide
4239863	4243147	+	Rc3793	embC	Ethambutol
4243147	4243232	+	intergenic embC-embA	embC-embA promoter region	Ethambutol
4243233	4246517	+	Rv3794	embA	Ethambutol
4246514	4249810	+	Rv3795	embB	Ethambutol
4326004	4327473	-	Rv3854c	ethA	Ethionamid
4327549	4328199	+	Rv3855	ethR	Ethionamid
4407528	4408202	-	RV3919c	gidB	Streptomycin

## Sheet: High Confidence Mutations
Antimicrobial	Locus	NT	Codon	WT_nt	Alt_nt	WT_aa	Alt_aa	Status	Note
Ethambutol	embB	916918	306	ATG	CTG,GTG,ATA,ATT,ATC,TTG	Met	Leu,Val,Ile,Ile,Ile,Leu	Coding
Ethambutol	embB	984	328	GAT	TAT	Asp	Tyr	Coding
Ethambutol	embB	12161217	406	GGC	AGC,GAC,GCC,TGC	Gly	Ser,Asp,Ala,Cys	Coding
Ethambutol	embB	1490	497	CAG	CGG	Gln	Arg	Coding
Ethambutol	embB	1061	354	GAC	GCC	Asp	Ala	Coding
Ethambutol	embC-embA promoter region	-12	-12	C	T	-	-	Non-coding
Fluoroquinolones	gyrA	220	74	GCC	TCC	Ala	Ser	Coding
Fluoroquinolones	gyrA	269	90	GCG	GTG	Ala	Val	Coding
Fluoroquinolones	gyrA	271	91	TCG	CCG	Ser	Pro	Coding
Fluoroquinolones	gyrA	280281	94	GAC	AAC,CAC,TAC,GGC,GCC	Asp	Asn,His,Tyr,Gly,Ala	Coding
Fluoroquinolones	gyrA	262	88	GGC	TGC	Gly	Cys	Coding
Fluoroquinolones	gyrB	1336	446	CGT	TGT	Arg	Cys	Coding
Fluoroquinolones	gyrB	1495	499	AAC	GAC,GTC	Asn	Asp,Val	Coding
Isoniazid	katG	836	279	GGC	GAC	Gly	Asp	Coding
Isoniazid	katG	944945	315	AGC	ATC,AAC,ACC,AGA,ACA	Ser	Ile,Asn,Thr,Arg,Thr	Coding
Isoniazid	katG	1574	525	CAG	CCG	Gln	Pro	Coding
Isoniazid	katG	1180	394	ACG	CCG,GCG	Thr	Pro,Ala	Coding
Isoniazid	katG	571	191	TGG	GGG	Trp	Gly	Coding
Isoniazid	katG	362	121	GGC	GAC	Gly	Asp	Coding
Isoniazid	furA-katG promoter region	-	-	-	-	-	-	Any_NC
Isoniazid	oxyR-ahpC promoter region	-81	-81	C	T	-	-	Non-coding	Classic position -39
Isoniazid	mabA-inhA promoter region	-15	-15	C	T	-	-	Non-coding
Ethionamide	mabA-inhA promoter region	-15	-15	C	T	-	-	Non-coding
Isoniazid	mabA-inhA promoter region	-8	-8	T	A,C	-	-	Non-coding
Ethionamide	mabA-inhA promoter region	-8	-8	T	A,C	-	-	Non-coding
Isoniazid	mabA-inhA promoter region	-17	-17	G	T	-	-	Non-coding
Ethionamide	mabA-inhA promoter region	-17	-17	G	T	-	-	Non-coding
Isoniazid	mabA	609	203	CTG	CTA	Leu	Leu	Coding
Ethionamide	mabA	609	203	CTG	CTA	Leu	Leu	Coding
Pyrazinamide	pncA promoter region	-11	-11	A	G	-	-	Non-coding
Pyrazinamide	pncA	545	182	TTG	TCG	Leu	Ser	Coding
Pyrazinamide	pncA	355	119	TGG	CGG	Trp	Arg	Coding
Pyrazinamide	pncA	169	57	CAC	GAC	His	Asp	Coding
Pyrazinamide	pncA	139	47	ACC	GCC	Thr	Ala	Coding
Rifampin	rpoB	508	170	GTC	TTC	Val	Phe	Coding	E. coli Position 251
Rifampin	rpoB	1289	430	CTG	CCG	Leu	Pro	Coding	E. coli Position 511
Rifampin	rpoB	1295	432	CAA	CTA,CCA	Gln	Leu,Pro	Coding	E. coli Position 513
Rifampin	rpoB	13031304	435	GAC	GTC,TAC	Asp	Val,Tyr	Coding	E. coli Position 516
Rifampin	rpoB	1322	441	TCG	TTG	Ser	Leu	Coding	E. coli Position 522
Rifampin	rpoB	13341335	445	CAC	AAC,GAC,TAC,CGC,CTC	His	Asn,Asp,Tyr,Arg,Leu	Coding	E. coli Position 526
Rifampin	rpoB	13491350	450	TCG	TTG,TGG,TGT,TTC,TGC	Ser	Leu,Trp,Cys,Phe	Coding	E. coli Position 531
Rifampin	rpoB	1355	452	CTG	CCG	Leu	Pro	Coding	E. coli Position 533
Rifampin	rpoB	1471	491	ATC	TTC	Ile	Phe	Coding	E. coli Position 572
Streptomycin	rrs	512	512	C	T	-	-	Non-coding
Streptomycin	rrs	513	513	A	C,T	-	-	Non-coding
Streptomycin	rrs	516	516	C	T	-	-	Non-coding
Streptomycin	rrs	906	906	A	C	-	-	Non-coding
Streptomycin	rpsL	128	43	AAG	AGG,ATG,AAT	Lys	Arg,Met,Asn	Coding
Streptomycin	rpsL	262263	88	AAG	CAG,AGG,AAT,ATG	Lys	Gln,Arg,Asn,Met	Coding
Kanamycin/Amikacin	eis promoter region	-10	-10	G	A	-	-	Non-coding
Kanamycin/Amikacin	eis promoter region	-37	-37	G	T	-	-	Non-coding
Kanamycin/Amikacin	rrs	1400	1400	A	G	-	-	Non-coding
Isoniazid	inhA	280	94	TCG	GCG	Ser	Ala	Coding
Ethionamide	inhA	280	94	TCG	GCG	Ser	Ala	Coding
Ethionamide	ethA	-	-	-	-	-	-	Stop_codon
Ethionamide	ethA	266	89	GCG	GAG	Ala	Glu	Coding
Isoniazid	katG	-	-	-	-	-	-	Stop_codon
