# Supplementary material for: iValiD-TB: a fully characterized Mycobacterium tuberculosis dataset for antimicrobial resistance bioinformatics workflow validations
Source: Frontiers journal article supplement (doi:10.3389/ftubr.2024.1441923), 2024-09-13
Supplement: Table_3.XLSX [file Table_3.XLSX]

## Sheet: Sheet1
Supplemental Table 3. Pairwise SNP distance matrix of the 50 iValid TB samples generated from the genomic consensus sequences based on the read mapped on the H37Rv reference sequence.
Only sites with A,T,C or G were used. Any sites with Nor INDELS were ignored.The SNP distance were calculated using Snp-dists, version 0.8.2 (https://github.com/tseemann/snp-dists)
snp-dists 0.8.2	iValiD-TB-S1	iValiD-TB-S10	iValiD-TB-S11	iValiD-TB-S12	iValiD-TB-S13	iValiD-TB-S14	iValiD-TB-S15	iValiD-TB-S16	iValiD-TB-S17	iValiD-TB-S18	iValiD-TB-S19	iValiD-TB-S2	iValiD-TB-S20	iValiD-TB-S21	iValiD-TB-S22	iValiD-TB-S23	iValiD-TB-S24	iValiD-TB-S25	iValiD-TB-S26	iValiD-TB-S27	iValiD-TB-S28	iValiD-TB-S29	iValiD-TB-S3	iValiD-TB-S30	iValiD-TB-S31	iValiD-TB-S32	iValiD-TB-S33	iValiD-TB-S34	iValiD-TB-S35	iValiD-TB-S36	iValiD-TB-S37	iValiD-TB-S38	iValiD-TB-S39	iValiD-TB-S4	iValiD-TB-S40	iValiD-TB-S41	iValiD-TB-S42	iValiD-TB-S43	iValiD-TB-S44	iValiD-TB-S45	iValiD-TB-S46	iValiD-TB-S47	iValiD-TB-S48	iValiD-TB-S49	iValiD-TB-S5	iValiD-TB-S50	iValiD-TB-S6	iValiD-TB-S7	iValiD-TB-S8
iValiD-TB-S1	0	1160	1230	1828	1177	1241	1143	1135	1185	1895	1207	1170	1249	1129	270	267	2190	1198	1220	1818	1908	1210	1221	1247	1929	1136	1167	2134	2068	1183	1112	1259	1230	1197	1281	237	301	1158	1906	1223	1183	388	1174	1197	1890	299	1194	1907	2051
iValiD-TB-S10	1160	0	1230	1809	236	1247	1124	394	1175	1878	1193	227	1251	392	1160	1152	2196	1188	1205	1802	1890	1204	1226	1257	1916	1138	224	2128	2061	236	318	1251	1221	1216	1280	1158	1102	229	1886	1227	1166	1182	235	1193	1867	1133	1179	1899	2013
iValiD-TB-S11	1230	1230	0	1752	1248	728	720	1198	756	1828	805	1242	719	1194	1232	1224	2153	792	804	1742	1837	798	705	746	1884	573	1235	2091	2008	1250	1173	443	817	800	458	1228	1159	1229	1832	701	769	1251	1239	666	1832	1204	775	1846	1968
iValiD-TB-S12	1828	1809	1752	0	1826	1778	1658	1777	1710	1860	1743	1815	1788	1771	1823	1815	1687	1736	1758	1801	1854	1755	1753	1787	1896	1659	1817	1627	1593	1831	1768	1783	1776	1744	1801	1827	1758	1804	1843	1752	1704	1844	1824	1717	1845	1793	1716	1738	1088
iValiD-TB-S13	1177	236	1248	1826	0	1265	1141	400	1188	1893	1212	200	1266	397	1177	1164	2212	1203	1219	1815	1900	1222	1238	1270	1926	1162	126	2154	2090	244	326	1273	1235	1236	1308	1172	1119	239	1898	1237	1183	1202	211	1205	1877	1146	1195	1908	2032
iValiD-TB-S14	1241	1247	728	1778	1265	0	745	1219	794	1827	824	1257	455	1216	1245	1234	2151	817	819	1726	1814	809	216	306	1872	656	1245	2098	2028	1264	1193	753	846	821	768	1241	1181	1248	1810	264	795	1261	1261	681	1838	1213	803	1872	1992
iValiD-TB-S15	1143	1124	720	1658	1141	745	0	1088	239	1737	526	1130	735	1081	1142	1130	2049	515	710	1647	1744	704	724	758	1779	646	1129	1986	1914	1140	1070	738	731	409	757	1134	1075	1120	1740	723	232	1163	1130	687	1732	1105	230	1750	1883
iValiD-TB-S16	1135	394	1198	1777	400	1219	1088	0	1139	1851	1170	389	1218	328	1136	1124	2162	1162	1179	1776	1864	1175	1196	1223	1882	1112	387	2107	2037	399	349	1226	1196	1185	1258	1130	1075	388	1861	1199	1132	1159	397	1166	1842	1105	1143	1864	1988
iValiD-TB-S17	1185	1175	756	1710	1188	794	239	1139	0	1792	571	1178	777	1132	1183	1173	2096	560	752	1709	1803	749	776	808	1834	692	1180	2036	1956	1190	1118	774	770	457	789	1186	1119	1169	1798	773	135	1197	1182	741	1779	1152	131	1798	1926
iValiD-TB-S18	1895	1878	1828	1860	1893	1827	1737	1851	1792	0	1817	1890	1858	1845	1885	1875	2184	1831	1833	145	974	1826	1813	1849	1006	1768	1881	2141	2085	1904	1832	1861	1849	1830	1896	1888	1820	1876	972	1810	1793	1906	1896	1794	949	1852	1804	1927	2033
iValiD-TB-S19	1207	1193	805	1743	1212	824	526	1170	571	1817	0	1202	823	1166	1198	1188	2124	170	797	1731	1822	790	801	830	1855	730	1200	2070	2004	1210	1143	825	814	610	848	1197	1144	1193	1807	805	561	1219	1205	758	1821	1175	572	1843	1964
iValiD-TB-S2	1170	227	1242	1815	200	1257	1130	389	1178	1890	1202	0	1258	388	1166	1156	2207	1194	1208	1812	1901	1211	1235	1267	1929	1152	188	2147	2076	235	316	1271	1229	1223	1302	1165	1110	228	1900	1234	1176	1193	184	1197	1878	1140	1186	1906	2028
iValiD-TB-S20	1249	1251	719	1788	1266	455	735	1218	777	1858	823	1258	0	1219	1248	1240	2191	838	812	1759	1853	810	446	479	1898	654	1251	2116	2037	1266	1192	747	844	816	766	1247	1182	1248	1844	436	790	1263	1250	677	1856	1217	791	1887	2019
iValiD-TB-S21	1129	392	1194	1771	397	1216	1081	328	1132	1845	1166	388	1219	0	1133	1123	2164	1156	1174	1767	1859	1169	1195	1219	1878	1107	381	2108	2041	398	349	1220	1189	1180	1254	1126	1074	383	1854	1193	1127	1153	396	1156	1838	1104	1139	1858	1983
iValiD-TB-S22	270	1160	1232	1823	1177	1245	1142	1136	1183	1885	1198	1166	1248	1133	0	0	2197	1192	1202	1805	1898	1206	1221	1245	1925	1144	1171	2137	2070	1187	1112	1258	1222	1198	1281	276	296	1161	1894	1224	1185	384	1176	1196	1872	296	1191	1893	2040
iValiD-TB-S23	267	1152	1224	1815	1164	1234	1130	1124	1173	1875	1188	1156	1240	1123	0	0	2191	1181	1194	1797	1887	1200	1210	1237	1915	1130	1159	2129	2065	1173	1101	1246	1212	1188	1268	273	293	1149	1885	1216	1177	382	1163	1188	1864	293	1180	1883	2032
iValiD-TB-S24	2190	2196	2153	1687	2212	2151	2049	2162	2096	2184	2124	2207	2191	2164	2197	2191	0	2137	2128	2133	2215	2124	2121	2126	2270	2035	2205	1227	1199	2224	2154	2174	2154	2079	2218	2197	2136	2185	2200	2117	2098	2222	2210	2132	2190	2157	2102	2091	1877
iValiD-TB-S25	1198	1188	792	1736	1203	817	515	1162	560	1831	170	1194	838	1156	1192	1181	2137	0	783	1742	1843	778	799	824	1873	743	1193	2084	2014	1206	1137	807	803	598	853	1183	1132	1189	1826	798	552	1210	1197	751	1837	1163	561	1828	1965
iValiD-TB-S26	1220	1205	804	1758	1219	819	710	1179	752	1833	797	1208	812	1174	1202	1194	2128	783	0	1741	1828	236	804	838	1867	732	1206	2073	2004	1223	1148	833	453	774	855	1199	1136	1196	1810	800	751	1224	1208	764	1831	1190	759	1833	1984
iValiD-TB-S27	1818	1802	1742	1801	1815	1726	1647	1776	1709	145	1731	1812	1759	1767	1805	1797	2133	1742	1741	0	941	1732	1712	1751	981	1669	1803	2075	2025	1819	1750	1767	1752	1739	1791	1817	1747	1798	939	1708	1700	1832	1813	1701	924	1775	1709	1864	1972
iValiD-TB-S28	1908	1890	1837	1854	1900	1814	1744	1864	1803	974	1822	1901	1853	1859	1898	1887	2215	1843	1828	941	0	1840	1800	1830	982	1744	1892	2175	2112	1913	1836	1861	1850	1824	1883	1905	1837	1892	192	1799	1804	1923	1904	1790	936	1870	1808	1928	2046
iValiD-TB-S29	1210	1204	798	1755	1222	809	704	1175	749	1826	790	1211	810	1169	1206	1200	2124	778	236	1732	1840	0	790	832	1873	712	1204	2062	1992	1224	1149	825	467	788	845	1208	1141	1201	1833	794	746	1220	1213	766	1825	1181	755	1842	1969
iValiD-TB-S3	1221	1226	705	1753	1238	216	724	1196	776	1813	801	1235	446	1195	1221	1210	2121	799	804	1712	1800	790	0	298	1851	648	1224	2066	1999	1244	1169	728	831	805	741	1217	1154	1223	1795	260	779	1238	1236	662	1822	1191	784	1848	1975
iValiD-TB-S30	1247	1257	746	1787	1270	306	758	1223	808	1849	830	1267	479	1219	1245	1237	2126	824	838	1751	1830	832	298	0	1882	677	1255	2081	2014	1276	1201	763	865	837	778	1250	1185	1257	1827	272	807	1266	1270	699	1841	1217	815	1866	1992
iValiD-TB-S31	1929	1916	1884	1896	1926	1872	1779	1882	1834	1006	1855	1929	1898	1878	1925	1915	2270	1873	1867	981	982	1873	1851	1882	0	1784	1917	2202	2146	1933	1860	1914	1889	1862	1934	1924	1857	1919	976	1851	1835	1948	1926	1844	600	1890	1838	1958	2079
iValiD-TB-S32	1136	1138	573	1659	1162	656	646	1112	692	1768	730	1152	654	1107	1144	1130	2035	743	732	1669	1744	712	648	677	1784	0	1143	1993	1917	1162	1090	587	756	722	594	1129	1071	1149	1736	637	699	1156	1156	602	1745	1101	704	1769	1888
iValiD-TB-S33	1167	224	1235	1817	126	1245	1129	387	1180	1881	1200	188	1251	381	1171	1159	2205	1193	1206	1803	1892	1204	1224	1255	1917	1143	0	2144	2081	229	313	1258	1229	1219	1291	1164	1110	227	1890	1224	1174	1190	196	1196	1869	1138	1184	1894	2022
iValiD-TB-S34	2134	2128	2091	1627	2154	2098	1986	2107	2036	2141	2070	2147	2116	2108	2137	2129	1227	2084	2073	2075	2175	2062	2066	2081	2202	1993	2144	0	609	2160	2089	2120	2095	2062	2147	2137	2072	2128	2160	2081	2033	2168	2141	2066	2146	2095	2042	2053	1782
iValiD-TB-S35	2068	2061	2008	1593	2090	2028	1914	2037	1956	2085	2004	2076	2037	2041	2070	2065	1199	2014	2004	2025	2112	1992	1999	2014	2146	1917	2081	609	0	2095	2026	2031	2017	1985	2056	2070	2012	2068	2105	2011	1960	2096	2080	1986	2086	2028	1965	1993	1747
iValiD-TB-S36	1183	236	1250	1831	244	1264	1140	399	1190	1904	1210	235	1266	398	1187	1173	2224	1206	1223	1819	1913	1224	1244	1276	1933	1162	229	2160	2095	0	327	1278	1242	1234	1317	1176	1124	242	1905	1240	1186	1206	244	1212	1890	1153	1194	1920	2051
iValiD-TB-S37	1112	318	1173	1768	326	1193	1070	349	1118	1832	1143	316	1192	349	1112	1101	2154	1137	1148	1750	1836	1149	1169	1201	1860	1090	313	2089	2026	327	0	1193	1167	1164	1228	1109	1055	314	1832	1170	1114	1141	322	1139	1818	1083	1124	1851	1978
iValiD-TB-S38	1259	1251	443	1783	1273	753	738	1226	774	1861	825	1271	747	1220	1258	1246	2174	807	833	1767	1861	825	728	763	1914	587	1258	2120	2031	1278	1193	0	848	827	252	1256	1174	1255	1864	724	783	1277	1265	686	1862	1229	797	1871	2001
iValiD-TB-S39	1230	1221	817	1776	1235	846	731	1196	770	1849	814	1229	844	1189	1222	1212	2154	803	453	1752	1850	467	831	865	1889	756	1229	2095	2017	1242	1167	848	0	811	868	1228	1162	1218	1842	825	770	1256	1234	794	1843	1206	775	1866	1995
iValiD-TB-S4	1197	1216	800	1744	1236	821	409	1185	457	1830	610	1223	816	1180	1198	1188	2079	598	774	1739	1824	788	805	837	1862	722	1219	2062	1985	1234	1164	827	811	0	864	1195	1141	1212	1818	799	453	1221	1224	772	1808	1166	455	1831	1962
iValiD-TB-S40	1281	1280	458	1801	1308	768	757	1258	789	1896	848	1302	766	1254	1281	1268	2218	853	855	1791	1883	845	741	778	1934	594	1291	2147	2056	1317	1228	252	868	864	0	1277	1185	1287	1889	738	808	1288	1296	704	1887	1249	820	1890	2032
iValiD-TB-S41	237	1158	1228	1827	1172	1241	1134	1130	1186	1888	1197	1165	1247	1126	276	273	2197	1183	1199	1817	1905	1208	1217	1250	1924	1129	1164	2137	2070	1176	1109	1256	1228	1195	1277	0	306	1156	1898	1223	1183	385	1167	1193	1874	304	1189	1897	2033
iValiD-TB-S42	301	1102	1159	1758	1119	1181	1075	1075	1119	1820	1144	1110	1182	1074	296	293	2136	1132	1136	1747	1837	1141	1154	1185	1857	1071	1110	2072	2012	1124	1055	1174	1162	1141	1185	306	0	1105	1830	1161	1115	365	1114	1130	1805	166	1120	1834	1961
iValiD-TB-S43	1158	229	1229	1804	239	1248	1120	388	1169	1876	1193	228	1248	383	1161	1149	2185	1189	1196	1798	1892	1201	1223	1257	1919	1149	227	2128	2068	242	314	1255	1218	1212	1287	1156	1105	0	1889	1224	1164	1184	241	1185	1866	1131	1173	1892	2017
iValiD-TB-S44	1906	1886	1832	1843	1898	1810	1740	1861	1798	972	1807	1900	1844	1854	1894	1885	2200	1826	1810	939	192	1833	1795	1827	976	1736	1890	2160	2105	1905	1832	1864	1842	1818	1889	1898	1830	1889	0	1792	1796	1915	1903	1780	931	1867	1800	1920	2036
iValiD-TB-S45	1223	1227	701	1752	1237	264	723	1199	773	1810	805	1234	436	1193	1224	1216	2117	798	800	1708	1799	794	260	272	1851	637	1224	2081	2011	1240	1170	724	825	799	738	1223	1161	1224	1792	0	778	1241	1238	657	1816	1196	783	1840	1973
iValiD-TB-S46	1183	1166	769	1704	1183	795	232	1132	135	1793	561	1176	790	1127	1185	1177	2098	552	751	1700	1804	746	779	807	1835	699	1174	2033	1960	1186	1114	783	770	453	808	1183	1115	1164	1796	778	0	1210	1176	737	1787	1147	6	1803	1930
iValiD-TB-S47	388	1182	1251	1844	1202	1261	1163	1159	1197	1906	1219	1193	1263	1153	384	382	2222	1210	1224	1832	1923	1220	1238	1266	1948	1156	1190	2168	2096	1206	1141	1277	1256	1221	1288	385	365	1184	1915	1241	1210	0	1199	1216	1898	368	1216	1916	2053
iValiD-TB-S48	1174	235	1239	1824	211	1261	1130	397	1182	1896	1205	184	1250	396	1176	1163	2210	1197	1208	1813	1904	1213	1236	1270	1926	1156	196	2141	2080	244	322	1265	1234	1224	1296	1167	1114	241	1903	1238	1176	1199	0	1203	1885	1144	1183	1910	2038
iValiD-TB-S49	1197	1193	666	1717	1205	681	687	1166	741	1794	758	1197	677	1156	1196	1188	2132	751	764	1701	1790	766	662	699	1844	602	1196	2066	1986	1212	1139	686	794	772	704	1193	1130	1185	1780	657	737	1216	1203	0	1792	1171	743	1826	1948
iValiD-TB-S5	1890	1867	1832	1845	1877	1838	1732	1842	1779	949	1821	1878	1856	1838	1872	1864	2190	1837	1831	924	936	1825	1822	1841	600	1745	1869	2146	2086	1890	1818	1862	1843	1808	1887	1874	1805	1866	931	1816	1787	1898	1885	1792	0	1840	1792	1909	2028
iValiD-TB-S50	299	1133	1204	1793	1146	1213	1105	1105	1152	1852	1175	1140	1217	1104	296	293	2157	1163	1190	1775	1870	1181	1191	1217	1890	1101	1138	2095	2028	1153	1083	1229	1206	1166	1249	304	166	1131	1867	1196	1147	368	1144	1171	1840	0	1157	1873	1995
iValiD-TB-S6	1194	1179	775	1716	1195	803	230	1143	131	1804	572	1186	791	1139	1191	1180	2102	561	759	1709	1808	755	784	815	1838	704	1184	2042	1965	1194	1124	797	775	455	820	1189	1120	1173	1800	783	6	1216	1183	743	1792	1157	0	1815	1943
iValiD-TB-S7	1907	1899	1846	1738	1908	1872	1750	1864	1798	1927	1843	1906	1887	1858	1893	1883	2091	1828	1833	1864	1928	1842	1848	1866	1958	1769	1894	2053	1993	1920	1851	1871	1866	1831	1890	1897	1834	1892	1920	1840	1803	1916	1910	1826	1909	1873	1815	0	1916
iValiD-TB-S8	2051	2013	1968	1088	2032	1992	1883	1988	1926	2033	1964	2028	2019	1983	2040	2032	1877	1965	1984	1972	2046	1969	1975	1992	2079	1888	2022	1782	1747	2051	1978	2001	1995	1962	2032	2033	1961	2017	2036	1973	1930	2053	2038	1948	2028	1995	1943	1916	0
iValiD-TB-S9	1228	1230	367	1747	1249	728	721	1200	760	1838	801	1242	713	1197	1232	1219	2139	790	802	1745	1843	796	708	740	1883	573	1234	2080	1999	1249	1175	444	818	801	458	1219	1160	1227	1831	700	769	1251	1240	659	1831	1205	773	1841	1979
[truncated: 1 more columns]
